# Supplementary material
Source: Elsevier journal article supplement (https://www.sciencedirect.com/science/article/pii/S1138359321002185)
Supplement: mmc1 [file S1138359321002185:mmc1.docx]

**APÉNDICES**

**APÉNDICE A:**

**DOCUMENTO DE INFORMACIÓN Y CONSENTIMIENTO POR ESCRITO**

El diagnóstico de Síndrome de Apnea Hipopnea (SAHS) requiere una detallada anamnesis y una completa exploración física, además debe complementarse con la confirmación de la presencia de patología del patrón de respiración durante el sueño, usando alguno de los estudios diagnósticos existentes.

Hoy a Usted le realizarán una prueba de poligrafía respiratoria en el servicio de Neumología del hospital de referencia para saber si tiene esta enfermedad. Existen otros tipos de prueba que pueden realizarse en la atención primaria para diagnosticar igualmente su enfermedad. Para ello, un grupo de médicos de familia de atención primaria, hemos preparado un estudio de “Validación de la interpretación de resultados con ApneaLinkTM versus poligrafía respiratoria para el diagnóstico del SAHS” y es por ello que le ofrecemos que participe. Mañana, cuando devuelva el dispositivo que ahora se le entregará, le presentaremos un dispositivo distinto y también le explicaremos como funciona. Deberá colocárselo esta misma noche e, igualmente, al día siguiente deberá devolverlo a la Unidad de Sueño de su hospital de referencia. De esta manera podremos comparar los dos sistemas de diagnóstico de su enfermedad y podremos recomendar el más eficiente. Al tratarse de registros de variables que fisiológicamente produce su propio cuerpo los efectos indeseables derivados del procedimiento son infrecuentes y pueden deberse a hipersensibilidad o irritación de la piel a la sustancia que se usa para conseguir la adhesión de los electrodos a la piel o irritación de mucosas.

Le invitamos, pues, a participar en este estudio de manera absolutamente voluntaria.

Gracias por su colaboración.

En caso de que tenga alguna duda o requiera alguna aclaración, podrá consultarlo con su médico de cabecera.

**APÉNDICE B:**

**VALIDACIÓN DE LA INTERPRETACIÓN DE RESULTADOS CON APNEALINK TM VERSUS POLIGRAFÍA RESPIRATORIA PARA EL DIAGNÓSTICO DE SAHS**

**CONSENTIMIENTO INFORMADO**

Yo,...................................................................................................(Nombre y apellidos)

He leído o me han leído la hoja de información que me han entregado.

He podido hacer preguntas sobre el estudio.

He recibido suficiente información sobre el tema.

He hablado con......................................................................(Nombre del entrevistador)

Entiendo que mi participación en el estudio es voluntaria.

Entiendo que puedo abandonar el estudio:

✓ Cuando lo desee

✓ Sin tener que ofrecer justificación alguna

✓ Sin que ello repercuta sobre la atención médica recibida

Asumo la responsabilidad de la devolución, correcto uso y mantenimiento del material cedido para el estudio por parte de la Unidad de Sueño del hospital de referencia.
